# Supplementary material
Source: publisher figshare collection journal article supplement (https://acs.figshare.com/ndownloader/files/3719134)
Supplement: Supplementary file 1 [file 3719134]

## Sheet: Sheet1
Mass	Abundance	Act. Peak	z	Iso. Mass	Pred. Peak	Possible ID	Ion Type	Molecular Formula
423.092	3110070	423.092	1+	423.092	423.092	several glucoronides	(M+Na)+	C17H20O11
425.363	941554	213.184	2+	425.361	213.185
429.231	4686503	429.232	1+	429.232	429.231
429.242	42156076	429.242	1+	429.242	429.242
429.252	7018029	429.252	1+	429.252	429.252	tocopherol degradation prod	(M+K)+	C24H38O4
455.119	6518374	455.119	1+	455.119	455.119	tocopherol degradation prod	(M+Na)+	C18H24O12
457.274	12220431	457.274	1+	457.274	457.274	tocopherol degradation prod	(M+K)+	C26H42O4
465.089	1129366	465.095	1+	465.095	465.089
585.164	3887097	585.164	1+	585.164	585.164
586.405	1080162	586.411	1+	586.411	586.405
613.972	970558	307.49	2+	613.973	307.49
623.123	8336136	623.122	1+	623.122	623.123	Genistein 4',7-O-diglucuronide	(M+H)+	C27H26O17
650.041	991580	325.523	2+	650.038	325.524
654.606	970987	327.811	2+	654.615	327.807
687.205	3234974	687.205	1+	687.205	687.205
711.191	3355026	711.191	1+	711.191	711.191
713.227	1545711	713.228	1+	713.228	713.227
719.141	1723848	719.137	1+	719.137	719.141	7-Hydroxy-2',5,6-trimethoxy-4',5'-methylenedioxyisoflavone 7-(2-p-coumaroylglucoside)	(M+K)+	C34H32O15
725.166	6926700	725.166	1+	725.166	725.166
725.223	1810248	725.222	1+	725.222	725.223
729.185	8023584	729.185	1+	729.185	729.185
729.202	16582697	729.202	1+	729.202	729.202
729.22	16493106	729.22	1+	729.22	729.22
729.264	2308937	729.265	1+	729.265	729.264
743.178	7103704	743.177	1+	743.177	743.178
743.22	3293165	743.217	1+	743.217	743.22
745.094	2739595	745.091	1+	745.091	745.094	NADP	(M+H)+	C21H29N7O17P3
747.181	3244571	747.181	1+	747.181	747.181
747.197	9888034	747.197	1+	747.197	747.197
747.213	18463020	747.214	1+	747.214	747.213	glucosides	(M+Na)+	C33H40O18
747.233	26194230	747.233	1+	747.233	747.233
747.267	4360264	747.265	1+	747.265	747.267
752.196	1429912	752.193	1+	752.193	752.196
759.219	1845992	759.215	1+	759.215	759.219
761.25	6082883	761.251	1+	761.251	761.25
762.094	1469669	762.095	1+	762.095	762.094
767.142	5908104	767.142	1+	767.142	767.142
767.158	13265553	767.16	1+	767.16	767.158
767.181	12183197	767.182	1+	767.182	767.181
771.235	4076434	771.236	1+	771.236	771.235	possible rhamnoside	(M+H)+	C34H42O20
785.151	7847476	785.152	1+	785.152	785.151	degalloyltheflavonin	(M+H)+	C36H32O20
785.17	20163646	785.171	1+	785.171	785.17
785.192	21905482	785.193	1+	785.193	785.192
789.225	6847169	789.226	1+	789.226	789.225
789.248	10687180	789.247	1+	789.247	789.248
793.208	1748257	793.21	1+	793.21	793.208	labadoside	(M+K)+	C38H42O16
805.14	3584321	805.141	1+	805.141	805.14
807.261	3475129	807.26	1+	807.26	807.261
813.253	4234590	813.251	1+	813.251	813.253
819.519	2109853	819.52	1+	819.52	819.519	40:8 PG	(M+H)+	C46H75O10P
823.15	7816008	823.15	1+	823.15	823.15
827.21	5331934	827.21	1+	827.21	827.21
831.199	2195916	831.197	1+	831.197	831.199
831.237	9903970	831.238	1+	831.238	831.237	uroporphyrins	(M+H)+	C40H38N4O16
831.262	16531824	831.265	1+	831.265	831.262
849.275	30550922	849.276	1+	849.276	849.275
867.286	4500378	867.284	1+	867.284	867.286	beta-D-glucopyranosyl-(1->6)]-beta-D-glucopyranoside	(M+Na)+	C38H52O21
869.223	11128751	869.221	1+	869.221	869.223
873.278	6783551	873.279	1+	873.279	873.278
887.236	14234018	887.234	1+	887.234	887.236
889.525	3831666	889.526	1+	889.526	889.525
891.262	10081304	891.263	1+	891.263	891.262
891.29	29970470	891.292	1+	891.292	891.29
908.311	979958	454.661	2+	908.316	454.659
909.248	4154304	909.249	1+	909.249	909.248
909.273	10162637	909.273	1+	909.273	909.273
909.302	45203932	909.301	1+	909.301	909.302
909.346	5328884	909.345	1+	909.345	909.346
923.322	10618632	923.32	1+	923.32	923.322	sambacolignoside	(M+H)+	C43H54O22
925.193	4726888	925.192	1+	925.192	925.193
929.25	14114638	929.249	1+	929.249	929.25
933.307	8635055	933.305	1+	933.305	933.307
943.267	3666735	943.267	1+	943.267	943.267	cassiaside B2?	(M+Na)+	C39H52O25
947.262	24065120	947.262	1+	947.262	947.262
951.318	13917355	951.318	1+	951.318	951.318
961.279	7607024	961.279	1+	961.279	961.279
965.335	2526631	965.335	1+	965.335	965.335
969.33	4240696	969.33	1+	969.33	969.33
971.271	3605153	971.27	1+	971.27	971.271
975.323	5242055	975.323	1+	975.323	975.323
977.334	4662735	977.335	1+	977.335	977.334
989.279	7332638	989.279	1+	989.279	989.279
993.333	18036518	993.333	1+	993.333	993.333
1011.35	31928430	1011.35	1+	1011.35	1011.35
1035.35	7422061	1035.35	1+	1035.35	1035.35
1049.31	10423185	1049.31	1+	1049.31	1049.31
1053.36	26016786	1053.36	1+	1053.36	1053.36
1071.38	26064102	1071.38	1+	1071.38	1071.38
1073.77	11186997	1073.78	1+	1073.78	1073.77
1091.32	11638841	1091.32	1+	1091.32	1091.32
1095.38	6328643	1095.38	1+	1095.38	1095.38
1109.33	13596960	1109.33	1+	1109.33	1109.33
1113.39	11779316	1113.39	1+	1113.39	1113.39
1137.4	5269603	1137.4	1+	1137.4	1137.4
1155.41	12891089	1155.4	1+	1155.4	1155.41
1173.42	15740230	1173.42	1+	1173.42	1173.42
1193.37	6286594	1193.37	1+	1193.37	1193.37
1211.38	5575377	1211.38	1+	1211.38	1211.38
1215.44	14287197	1215.43	1+	1215.43	1215.44
1233.45	13572966	1233.45	1+	1233.45	1233.45
1271.41	7324815	1271.41	1+	1271.41	1271.41
1317.48	6324800	1317.48	1+	1317.48	1317.48
1377.52	6318107	1377.52	1+	1377.52	1377.52
		213.688	2+	426.368	213.687
